# Supplementary material
Source: HighWire-hosted journal article supplement (http://rc.rcjournal.com/highwire/filestream/26469/field_highwire_adjunct_files/5/Table_S5_Supplemental_Digital_Content.docx)
Supplement: Table_S5_Supplemental_Digital_Content.docx [file Table_S5_Supplemental_Digital_Content.docx]

**Table S5. Adverse Event Proportion of Prone Positioning Reported by Previous Systematic Reviews Compared with the Current Scoping Review***

|  | **Lee, 2014**1 | | **Park, 2015**2 | | **Mora-Arteaga, 2015**3 | | **Bloomfield, 2015**4 | | **Current scoping review** | |
| --- | --- | --- | --- | --- | --- | --- | --- | --- | --- | --- |
|  | **No. RCT**† | **AE %** | **No. RCT**† | **AE%** | **No. RCT**† | **AE%** | **No. RCT**† | **AE%** | **No. Studies**† | **AE%** |
| VAP | 6 | 21.2 | 3 | 17.6 | 4 | 21.4 |  | NR | 2 | 28.2 |
| Pressure sores | 6 | 42.1 | 4 | 35.8 | 4 | 34.0 | 3 | 41.3 | 7 | 29.7 |
| Unplanned extubation | 7 | 10.4 |  | NR | 4 | 10.9 |  | NR | 5 | 7.7 |
| Displacement of ETT | 2 | 1.9 |  | NR | 5 | 3.7 | 8 | 10.5 | 4 | 1.9 |
| Airway obstruction | 4 | 15.8 |  | NR | 4 | 14.6 | 3 | 15.9 | 2 | 4.0 |
| Venous/arterial lines loss | 4 | 8.8 |  | NR | 2 | 10.9 |  | NR | 7 | 0.9 |
| Pneumothorax | 4 | 5.7 | 4 | 5.1 | 4 | 5.8 | 4 | 6.6 | 2 | 2.9 |
| Cardiac arrest | 3 | 14.5 | 3 | 15.3 |  | NR |  | NR | 5 | 3.4 |
| Arrhythmia | 3 | 17.3 |  | NR |  | NR | 3 | 15.3 | 2 | 15.4 |

*AE% (occurrence rate): proportion of patients who experienced the adverse event due to prone positioning divided by the total number of patients who received prone positioning from original studies contributing data.

†No. studies contributing data: counting studies that collected data on adverse events, regardless of whether an event occurred.

AE = adverse event, VAP = ventilation-associated pneumonia, ETT = endotracheal extubation, NR = not reported, RCT = randomized controlled trial

**References for Table S5**

1. Lee JM, Bae W, Lee YJ, Cho Y-J. The Efficacy and Safety of Prone Positional Ventilation in Acute Respiratory Distress Syndrome. Crit Care Med 2014;42(5):1252–62.

2. Park SY, Kim HJ, Yoo KH, Park YB, Kim SW, Lee SJ, et al. The efficacy and safety of prone positioning in adults patients with acute respiratory distress syndrome: a meta-analysis of randomized controlled trials. J Thorac Dis 2015;7(3):356–67.

3. Mora-Arteaga JA, Bernal-Ramírez OJ, Rodríguez SJ. Efecto de la ventilación mecánica en posición prona en pacientes con síndrome de dificultad respiratoria aguda. Una revisión sistemática y metanálisis. Med Intensiva 2015;39(6):352–65.

4. Bloomfield R, Noble DW, Sudlow A. Prone position for acute respiratory failure in adults. Cochrane Database Syst Rev 2015;(11):CD008095.
